# Supplementary material for: Rediscovery of Laura’s glassfrog Nymphargus laurae (Anura: Centrolenidae) with new data on its morphology, colouration, phylogenetic position and conservation in Ecuador
Source: PeerJ. 2021 Dec 23;9:e12644. doi: 10.7717/peerj.12644 (PMC8710250; doi:10.7717/peerj.12644)
Supplement: Supplemental Information 2 — Sequences generated in previous studies were downloaded from GenBank. Newly generated sequences are in bold blue. [file peerj-09-12644-s002.xlsx]

## Sheet: Hoja1
Supplemental Table S1. Taxa and genetic markers used in this study. Sequences generated in previous studies were downloaded from GenBank. Newly generated sequences are in bold blue.
Species		Voucher	12S	16S	RAG1	COI
Allophryne	resplendens	MZUNAP-01-605	JQ436697	JQ436698	—	—
Allophryne	ruthveni	MAD 1852	AY819328	—	—	KU494331
Allophryne	ruthveni	MAD 1857	—	EU662973	EU663432	—
Celsiella	revocata	MHNLS 17319	EU663379	EU663019	EU663479	—
Celsiella	vozmedianoi	MHNLS 17877	EU663385	EU663025	EU663531	—
Centrolene	altitudinalis	MHNLS 17194	EU663333	EU662974	EU663433	—
Centrolene	antioquiensis	NRPS 014	EU663336	EU662977	EU663436	—
Centrolene	sanchezi	QCAZ 22728	EU663337	EU662978	EU663437	—
Centrolene	ballux	QCAZ 40182	—	JX126954	—	—
Centrolene	ballux	QCAZ 40196	KF639754	—	—	—
Centrolene	buckleyi	KU 178031	EU663338	EU662979	—	—
Centrolene	charapita	MHNC 13933	KM068247	KM068256	—	—
Centrolene	condor	QCAZ 44896	KF639755	JX126955	—	—
Centrolene	daidalea	MHUA 3271	EU663366	EU663007	EU663465	—
Centrolene	geckoidea	KU 178015	EU663341	EU662982	EU663440	—
Centrolene	heloderma	QCAZ 40200	KF639757	JX126956	—	—
Centrolene	hesperia	MHNSM 25802	EU663345	EU662986	EU663444	—
Centrolene	hybrida	MAR 347	EU663346	EU662987	EU663445	—
Centrolene	lynchi	QCAZ 40191	—	JX126957	—	—
Centrolene	lynchi	QCAZ 40192	KF639758	—	—	—
Centrolene	muelleri	PV1001	KF639759	JX126958	—	—
Centrolene	notosticta	MAR 510	EU663351	EU662992	EU663450	—
Centrolene	peristicta	QCAZ 22312	EU663352	EU662993	EU663451	—
Centrolene	pipilata	KU 178154	EU663353	EU662994	EU663452	—
Centrolene	savagei	MHUA 4094	EU663380	EU663020	EU663480	—
Centrolene	venezuelense	MHNLS 16497	EU663360	EU663001	EU663459	—
Chimerella	mariaelenae	QCAZ 31729	EU663350	EU662991	EU663449	—
Cochranella	erminea	MHNC 7247	KF639762	KF534360	—	—
Cochranella	euknemos	CH 5109	EU663367	EU663008	EU663466	KR862886
Cochranella	granulosa	CH 5121	—	EU663010	—	—
Cochranella	granulosa	USNM 559082	EU663370	—	EU663469	—
Cochranella	litoralis	QCAZ 27693	EU663349	EU662990	EU663448	—
Cochranella	mache	QCAZ 27747	EU663373	EU663013	EU663472	—
Cochranella	nola	CBG 1096	EU663381	EU663021	EU663481	—
Cochranella	resplendens	QCAZ 38088	KF639763	KF534361	—	—
Espadarana	andina	JMG 366	EU663335	EU662976	EU663435	—
Espadarana	callistomma	QCAZ 28555	EU663340	EU662981	EU663439	—
Espadarana	prosoblepon	UCR 17102	EU663354	EU662995	EU663453	FJ66590.1C
Hyalinobatrachium	aureoguttatum	QCAZ 32105	EU663391	EU663032	EU663491	—
Hyalinobatrachium	bergeri	MHNC 5676	EU663392	EU663033	EU663492l	—
Hyalinobatrachium	cappellei	MHNLS 16475	EU663401	EU663040	EU663499	—
Hyalinobatrachium	carlesvilai	CBG 1099	EU663388	EU663030	EU663489i	—
Hyalinobatrachium	chirripoi	UCR 17424	EU663398	EU663037	EU663496	KF604294.1
Hyalinobatrachium	colymbiphyllum	UCR 17423	EU663400	EU663039	EU663498	KF604297.1
Hyalinobatrachium	duranti	MHNLS 16493	EU663402	EU663041	EU663500	—
Hyalinobatrachium	fleischmanni	USNM 559092	EU663406	EU663045	EU663504	—
Hyalinobatrachium	fragile	MHNLS 17161	EU663407	EU447286	EU663505	—
Hyalinobatrachium	iaspidiense	MHNLS 17126	EU663408	EU663047	EU663506	—
Hyalinobatrachium	ibama	MAR 503	EU663409	EU663048	EU663507	—
Hyalinobatrachium	kawense	MTD 48144	EU663387	EU663029	EU663488	—
Hyalinobatrachium	mondolfii	MHNLS 17119	EU663411	EU663050	EU663509	—
Hyalinobatrachium	munozorum	QCAZ 31056	EU663395	EU663034	EU663493	—
Hyalinobatrachium	orientale	MHNLS 17878	EU663413	EU447289	EU663511	—
Hyalinobatrachium	orocostale	MHNLS 17247	EU663414	EU447284	EU663512	—
Hyalinobatrachium	pallidum	MHNLS 17238	EU663415	EU663052	EU663513	—
Hyalinobatrachium	pellucidum	QCAZ 29438	EU663397	EU663036	EU663495	—
Hyalinobatrachium	talamancae	CH 5330	EU663418	EU663054	EU663516	—
Hyalinobatrachium	tatayoi	MHNLS 17174	EU663419	EU663055	EU663517	—
Hyalinobatrachium	taylori	MHNLS 17141	EU663420	EU663056	EU663518	—
Hyalinobatrachium	tricolor	MNHN 2011	EU663386	EU663027	EU663486	—
Hyalinobatrachium	valerioi	UCR17418	EU663421	EU663058	EU663519	—
Hyalinobatrachium	yaku	MZUTI5002	MF002067.1	MF002065.1	—	—
Ikakogi	tayrona	MAR 544	EU663356	EU662997	EU663455	—
Nymphargus	anomalus	QCAZ 41312	—	KF534364	—	—
Nymphargus	anomalus	QCAZ 45703	KF639766	—	—	—
Nymphargus	balionotus	JMG0796	MH746563	MH746537	—	—
Nymphargus	bejaranoi	CBG1488	EU663422	EU663059	EU663522	—
Nymphargus	cariticommatus	MRy544	MH746581	MH746555	—	—
Nymphargus	chancas	CORBIDI10471	—	KM068277	—	—
Nymphargus	cochranae	QCAZ 31113	EU663425	EU663061	EU663523	—
Nymphargus	colomai	QCAZ41590	KF639767	KF534365	—	—
Nymphargus	garciae	KU202796	AY326022	AY326022	—	—
Nymphargus	grandisonae	QCAZ 22310	EU663344	EU662985	EU663443	—
Nymphargus	griffithsi	QCAZ 24825	MT232661	MT232431	—	—
Nymphargus	humboldti	QCAZ 45713	MH746587	—	—
Nymphargus	lasgralarias	QCAZ 31768	EU663426	EU663062	EU663524	—
Nymphargus	laurae	DHMECN 15383	MZ820691	MZ831508	MZ835991	MZ828399
Nymphargus	lindae	QCAZ 41572	MH746582	MH746556	—	—
Nymphargus	lindae	QCAZ 41573	MH746583	MH746557
Nymphargus	manduriacu	JMG0615	MH746582	MH746556	—	—
Nymphargus	mariae	QCAZ37927	KF639771	KF534368	EU663478	—
Nymphargus	megacheirus	KU 143272	EU663427	EU663063	EU663525	—
Nymphargus	mixomaculatus	MTD 45200	KF639768	EU663064	EU663526	—
Nymphargus	ocellatus	GCI 363	KF639769	KF534366	KF639787	—
Nymphargus	pluvialis	KU 173224	EU663428	EU663065	EU663527	—
Nymphargus	posadae	QCAZ 25090	—	KF534367	—	—
Nymphargus	posadae	QCAZ 26023	KF639770	—	EU663528	—
Nymphargus	rosada	MHUA 4308	EU663429	EU663066	EU663529	—
Nymphargus	siren	KU 179171	EU663430	EU663067	EU663530	—
Nymphargus	siren	QCAZ 45713	MH746588	—	—	—
Nymphargus	sp.	KU20281	MH746577	MH746551	—	—
Nymphargus	spilotus	JD060	MH746590	MH746561	—	—
Nymphargus	sucre	MZUTI1422	MH746579	MH746553	—	—
Nymphargus	vicenteruedai	AAV 119	EU663424	EU663058	EU663521l	—
Nymphargus	wileyi	QCAZ 27435	EU663431	EU663068	EU663532	—
Rulyrana	adiazeta	MAR 483	EU663361	EU663002	EU663460	—
Rulyrana	flavopunctata	QCAZ 32265	EU663368	EU663009	EU663467	KP49252
Rulyrana	mcdiarmidi	MHNC14015	KY611470	KY611470	—	—
Rulyrana	saxiscandens	MNCN/ADN 51737	KF639772	KF534369	—	—
Rulyrana	spiculata	MHNSM 24867	EU663382	EU663022	EU663482	—
Rulyrana	susatamai	MAR 337	EU663384	EU663024	EU663484	—
Rulyrana	tangarana	MNCN/ADN 51751	—	KF534370	—	—
Sachatamia	albomaculata	USNM 534151	EU663362	EU663003	EU663461	KR863092
Sachatamia	ilex	UCR 16861	EU663347	EU662988	EU663446	KR863103
Sachatamia	orejuela	QCAZ 45993	KF639773	KF534371	—	—
Sachatamia	punctulata	MHUA 4071	EU663378	EU663018	EU663477	—
Teratohyla	adenocheira	LSUMZ H-17409	KF639774	—	KF639788	—
Teratohyla	adenocheira	LSUMZ H-17463	—	KF534372	—	—
Teratohyla	amelie	MHNC 5646 / MNCN ADN 20619	EU663365	EU663005	EU663463	—
Teratohyla	midas	KHJ1005	EU663374	EU663014	EU663473l	—
Teratohyla	pulverata	USNM 538588	EU663416	EU663053	EU6635145	—
Teratohyla	spinosa	USNM 538863	EU663383	EU663023	EU663483	KR863113
Vitreorana	antisthenesi	MHNLS 17909	EU663390	EU663031	EU663490	—
Vitreorana	castroviejoi	MHNLS 16446	EU663363	EU663004	EU663462	—
Vitreorana	eurygnatha	CFBH 5729	AY843595	AY843595	AY844383	KU494818
Vitreorana	gorzulae	MHNLS 16036	EU663343	EU662984	EU663442	—
Vitreorana	helenae	MHNLS 17139	EU663372	EU663012	EU663471	—
Vitreorana	ritae	MB 165	—	EU663017	—	—
Vitreorana	ritae	MB 292	EU663377	—	EU663476	—
Vitreorana	uranoscopa	UFRGS 4380	—	KF639775	—	—
Vitreorana	uranoscopa	UFRGS 4381	KF639776	—	—	KU494822
